# Supplementary material for: The effect of postmigration stressors on the prevalence of depressive symptoms among refugees in Germany. Analysis of the IAB-BAMF-SOEP Survey 2016
Source: PubMed Central journal article supplement (PMC7686213; doi:10.1007/s00103-020-03238-0), 2020-10-25
Supplement: 103_2020_3238_MOESM1_ESM.pdf [file 103_2020_3238_MOESM1_ESM.pdf]

**Bundesgesundheitsblatt 12/2020**

Elektronisches Zusatzmaterial zum Beitrag:

**Der Einfluss postmigratorischer Stressoren auf die Prävalenz depressiver Symptome bei Geflüchteten in Deutschland.  
Analyse anhand der IAB-BAMF-SOEP-Befragung 2016**

Niklas Nutsch<sup>1</sup>

Kayvan Bozorgmehr<sup>1,2\*</sup>

<sup>1</sup>Bevölkerungsmedizin und Versorgungsforschung, Fakultät für Gesundheitswissenschaften, Universität Bielefeld, Postfach 10 01 31, 33501 Bielefeld, Deutschland

<sup>2</sup>Sektion Health Equity Studies & Migration, Abteilung Allgemeinmedizin und Versorgungsforschung, Im Neuenheimer Feld 130.3, 69120 Heidelberg, Deutschland

**Korrespondenzautor:**

Prof. Dr. med. Kayvan Bozorgmehr (MSc)

AG2 - Bevölkerungsmedizin und Versorgungsforschung

Fakultät für Gesundheitswissenschaften

Universität Bielefeld

Postfach 10 01 31

33501 Bielefeld

Email: [kayvan.bozorgmehr@uni-bielefeld.de](mailto:kayvan.bozorgmehr@uni-bielefeld.de)

Inhalt:

**Tabelle Z1:** Modell I: Zusammenhang zwischen soziodemografischen Faktoren und Depression

**Tabelle Z2:** Modell II: Zusammenhang zwischen postmigratorischen Stressoren und Depression

**Tabelle Z3:** Modell III: Zusammenhang zwischen psychosozialen Faktoren und Depression

**Tabelle Z4:** Modell IV: Zusammenhang zwischen Depression und postmigratorischen Stressoren und soziodemografischen Faktoren

**Tabelle Z5:** Modell V: Zusammenhang zwischen Depression und postmigratorischen Stressoren, soziodemografischen Faktoren und psychosozialen Faktoren

**Tabelle Z1:** Modell I: Zusammenhang zwischen soziodemografischen Faktoren und Depression

| Prädiktorvariablen<br>OR [95%KI]    |                                  | Alter               | Alter + Geschlecht  | Alter + Geschlecht<br>+ Partnerschaft | Alter + Geschlecht<br>+ Partnerschaft +<br>Bildung | Modell I final             |
|-------------------------------------|----------------------------------|---------------------|---------------------|---------------------------------------|----------------------------------------------------|----------------------------|
| Alter                               |                                  | 1,005 [0,998-1,012] | 1,005 [0,998-1,012] | <b>1,012 [1,004-1,020]</b>            | <b>1,009 [1,001-1,018]</b>                         | <b>1,010 [1,001-1,018]</b> |
| Geschlecht                          | Männlich                         |                     | 1 (Ref.)            | 1 (Ref.)                              | 1 (Ref.)                                           | 1 (Ref.)                   |
|                                     | Weiblich                         |                     | 0,984 [0,834-1,160] | 1,078 [0,908-1,279]                   | 1,078 [0,901-1,290]                                | 1,053 [0,876-1,267]        |
| Partnerschaft                       | Ja                               |                     |                     | 1 (Ref.)                              | 1 (Ref.)                                           | 1 (Ref.)                   |
|                                     | Nein                             |                     |                     | <b>1,304 [1,099-1,548]</b>            | 1,170 [0,978-1,401]                                | 1,188 [0,989-1,426]        |
| Bildung                             | Kein Schulbesuch                 |                     |                     |                                       | 1 (Ref.)                                           | 1 (Ref.)                   |
|                                     | Grundschule                      |                     |                     |                                       | <b>0,672 [0,497-0,909]</b>                         | <b>0,661 [0,488-0,894]</b> |
|                                     | Mittelschule                     |                     |                     |                                       | <b>0,674 [0,518-0,876]</b>                         | <b>0,680 [0,523-0,886]</b> |
|                                     | Weiterführende/<br>Andere Schule |                     |                     |                                       | <b>0,743 [0,579-0,952]</b>                         | <b>0,713 [0,555-0,916]</b> |
| PTS-Wert der<br>Staatsangehörigkeit | PTS-Wert 1-3                     |                     |                     |                                       |                                                    | 1 (Ref.)                   |
|                                     | PTS-Wert 4-5                     |                     |                     |                                       |                                                    | 1,081 [0,857-1,363]        |
| Nagelkerkes R <sup>2</sup>          |                                  | 0,001               | 0,001               | 0,005                                 | 0,007                                              | 0,007                      |
| Modell-df                           |                                  | 1                   | 2                   | 3                                     | 6                                                  | 7                          |
| N                                   |                                  | 4134                | 4134                | 4111                                  | 3774                                               | 3711                       |

**Tabelle Z2:** Modell II: Zusammenhang zwischen postmigratorischen Stressoren und Depression

| Prädiktorvariablen OR [95%KI] |                            | Aufenthaltsstatus          | Aufenthaltsstatus + Anhörung | Aufenthaltsstatus + Anhörung + Erwerbstätigkeit | Aufenthaltsstatus + Anhörung + Erwerbstätigkeit + Wohnzufriedenheit | Aufenthaltsstatus + Anhörung + Erwerbstätigkeit + Wohnzufriedenheit + Sprachkenntnisse | Modell II final            |
|-------------------------------|----------------------------|----------------------------|------------------------------|-------------------------------------------------|---------------------------------------------------------------------|----------------------------------------------------------------------------------------|----------------------------|
| Aufenthaltsstatus             | Anerkennung                | 1 (Ref.)                   | 1 (Ref.)                     | 1 (Ref.)                                        | 1 (Ref.)                                                            | 1 (Ref.)                                                                               | 1 (Ref.)                   |
|                               | Asylsuchend oder Ablehnung | <b>1,763 [1,516-2,050]</b> | <b>1,688 [1,434-1,987]</b>   | <b>1,705 [1,448-2,008]</b>                      | <b>1,496 [1,264-1,770]</b>                                          | <b>1,452 [1,225-1,720]</b>                                                             | <b>1,300 [1,087-1,556]</b> |
| Anhörung                      | Nein                       |                            | 1 (Ref.)                     | 1 (Ref.)                                        | 1 (Ref.)                                                            | 1 (Ref.)                                                                               | 1 (Ref.)                   |
|                               | Ja                         |                            | 0,902 [0,760-1,071]          | 0,892 [0,751-1,059]                             | 0,862 [0,723-1,028]                                                 | 0,867 [0,726-1,034]                                                                    | 0,933 [0,773-1,127]        |
| Erwerbstätigkeit              | Erwerbstätig               |                            |                              | 1 (Ref.)                                        | 1 (Ref.)                                                            | 1 (Ref.)                                                                               | 1 (Ref.)                   |
|                               | Nicht erwerbstätig         |                            |                              | <b>2,087 [1,582-2,751]</b>                      | <b>2,080 [1,569-2,759]</b>                                          | <b>1,977 [1,486-2,630]</b>                                                             | <b>1,848 [1,365-2,501]</b> |
| Wohnzufriedenheit             |                            |                            |                              |                                                 | <b>0,870 [0,849-0,892]</b>                                          | <b>0,872 [0,851-0,894]</b>                                                             | <b>0,905 [0,881-0,930]</b> |
| Sprachkenntnisse (Deutsch)    | Gut                        |                            |                              |                                                 |                                                                     | 1 (Ref.)                                                                               | 1 (Ref.)                   |
|                               | Mittelmäßig                |                            |                              |                                                 |                                                                     | <b>1,273 [1,010-1,605]</b>                                                             | 1,161 [0,908-1,486]        |
|                               | Schlecht                   |                            |                              |                                                 |                                                                     | <b>1,397 [1,120-1,743]</b>                                                             | 1,231 [0,971-1,559]        |
| Einsamkeit                    |                            |                            |                              |                                                 |                                                                     |                                                                                        | <b>1,207 [1,175-1,240]</b> |
| Nagelkerkes R <sup>2</sup>    |                            | 0,021                      | 0,021                        | 0,033                                           | 0,079                                                               | 0,082                                                                                  | 0,161                      |
| Modell-df                     |                            | 1                          | 2                            | 3                                               | 4                                                                   | 6                                                                                      | 7                          |
| N                             |                            | 3906                       | 3832                         | 3832                                            | 3817                                                                | 3813                                                                                   | 3628                       |

**Tabelle Z3:** Modell III: Zusammenhang zwischen psychosozialen Faktoren und Depression

| Prädiktorvariablen<br>OR [95%KI] |                        | Selbstwertgefühl           | Selbstwertgefühl +<br>Resilientes<br>Copingverhalten | Selbstwertgefühl +<br>Resilientes<br>Copingverhalten +<br>Lebenszufriedenheit | Modell III final            |
|----------------------------------|------------------------|----------------------------|------------------------------------------------------|-------------------------------------------------------------------------------|-----------------------------|
| Selbstwertgefühl                 | Hoch                   | 1 (Ref.)                   | 1 (Ref.)                                             | 1 (Ref.)                                                                      | 1 (Ref.)                    |
|                                  | Mittelmäßig bis gering | <b>1,639 [1,373-1,956]</b> | <b>1,482 [1,225-1,793]</b>                           | <b>1,312 [1,074-1,604]</b>                                                    | 1,225 [0,971-1,545]         |
| Resilientes<br>Copingverhalten   | Hoch                   |                            | 1 (Ref.)                                             | 1 (Ref.)                                                                      | 1 (Ref.)                    |
|                                  | Mittelmäßig bis gering |                            | <b>1,201 [1,018-1,417]</b>                           | 1,131 [0,951-1,344]                                                           | <b>1,226 [1,005-1,495]</b>  |
| Lebenszufriedenheit              | Hoch                   |                            |                                                      | 1 (Ref.)                                                                      | 1 (Ref.)                    |
|                                  | Mittelmäßig            |                            |                                                      | <b>1,752 [1,467-2,093]</b>                                                    | <b>1,418 [1,157-1,737]</b>  |
|                                  | Gering                 |                            |                                                      | <b>6,420 [5,035-8,187]</b>                                                    | <b>3,322 [2,498-4,417]</b>  |
| Ängstlichkeit                    | Keine Ängstlichkeit    |                            |                                                      |                                                                               | 1 (Ref.)                    |
|                                  | Ängstlichkeit          |                            |                                                      |                                                                               | <b>9,799 [8,123-11,821]</b> |
| Nagelkerkes R <sup>2</sup>       |                        | 0,011                      | 0,011                                                | 0,105                                                                         | 0,330                       |
| Modell-df                        |                        | 1                          | 2                                                    | 4                                                                             | 5                           |
| N                                |                        | 3881                       | 3549                                                 | 3544                                                                          | 3493                        |

**Tabelle Z4:** Modell IV: Zusammenhang zwischen Depression und postmigratorischen Stressoren und soziodemografischen Faktoren

| Prädiktorvariablen<br>OR [95%KI]    |                                  | Modell I +<br>Aufenthaltsstatus | Modell I +<br>Aufenthaltsstatus +<br>Anhörung | Modell I +<br>Aufenthaltsstatus +<br>Anhörung +<br>Erwerbstätigkeit | Modell I +<br>Aufenthaltsstatus +<br>Anhörung +<br>Erwerbstätigkeit +<br>Wohnzufriedenheit | Modell I +<br>Aufenthaltsstatus +<br>Anhörung +<br>Erwerbstätigkeit +<br>Wohnzufriedenheit +<br>Sprachkenntnisse | Modell IV final            |
|-------------------------------------|----------------------------------|---------------------------------|-----------------------------------------------|---------------------------------------------------------------------|--------------------------------------------------------------------------------------------|------------------------------------------------------------------------------------------------------------------|----------------------------|
| <b>Soziodemografische Faktoren</b>  |                                  |                                 |                                               |                                                                     |                                                                                            |                                                                                                                  |                            |
| Alter                               |                                  | 1,009 [1,001-1,018]             | 1,009 [1,001-1,018]                           | 1,009 [1,001-1,018]                                                 | 1,013 [1,004-1,022]                                                                        | 1,011 [1,002-1,020]                                                                                              | 1,006 [0,997-1,016]        |
| Geschlecht                          | Männlich                         | 1 (Ref.)                        | 1 (Ref.)                                      | 1 (Ref.)                                                            | 1 (Ref.)                                                                                   | 1 (Ref.)                                                                                                         | 1 (Ref.)                   |
|                                     | Weiblich                         | 0,982 [0,809-1,192]             | 0,952 [0,782-1,158]                           | 0,900 [0,738-1,096]                                                 | 0,960 [0,784-1,175]                                                                        | 0,942 [0,769-1,154]                                                                                              | 1,088 [0,877-1,350]        |
| Partnerschaft                       | Ja                               | 1 (Ref.)                        | 1 (Ref.)                                      | 1 (Ref.)                                                            | 1 (Ref.)                                                                                   | 1 (Ref.)                                                                                                         | 1 (Ref.)                   |
|                                     | Nein                             | 1,003 [0,829-1,213]             |                                               | 1,004 [0,828-1,217]                                                 | 0,948 [0,779-1,154]                                                                        | 0,963 [0,791-1,172]                                                                                              | 0,919 [0,744-1,134]        |
| Bildung                             | Kein Schulbesuch                 | 1 (Ref.)                        | 1 (Ref.)                                      | 1 (Ref.)                                                            | 1 (Ref.)                                                                                   | 1 (Ref.)                                                                                                         | 1 (Ref.)                   |
|                                     | Grundschule                      | 0,793 [0,581-1,084]             | 0,825 [0,601-1,133]                           | 0,873 [0,635-1,200]                                                 | 0,836 [0,605-1,157]                                                                        | 0,847 [0,612-1,172]                                                                                              | 1,017 [0,716-1,444]        |
|                                     | Mittelschule                     | 0,761 [0,579-1,001]             | 0,765 [0,579-1,011]                           | 0,792 [0,599-1,047]                                                 | 0,756 [0,567-1,007]                                                                        | 0,789 [0,591-1,053]                                                                                              | 1,034 [0,755-1,418]        |
|                                     | Weiterführende/<br>Andere Schule | 0,844 [0,649-1,098]             | 0,848 [0,649-1,108]                           | 0,902 [0,689-1,180]                                                 | 0,850 [0,646-1,119]                                                                        | 0,929 [0,701-1,232]                                                                                              | 1,126 [0,827-1,532]        |
| PTS-Wert der<br>Staatsangehörigkeit | PTS-Level 1-3                    | 1 (Ref.)                        | 1 (Ref.)                                      | 1 (Ref.)                                                            | 1 (Ref.)                                                                                   | 1 (Ref.)                                                                                                         | 1 (Ref.)                   |
|                                     | PTS-Level 4-5                    | 1,226 [0,961-1,564]             | 1,209 [0,945-1,547]                           | 1,170 [0,913-1,499]                                                 | <b>1,318 [1,018-1,706]</b>                                                                 | 1,286 [0,993-1,666]                                                                                              | <b>1,344 [1,019-1,771]</b> |
| <b>Postmigratorische Stressoren</b> |                                  |                                 |                                               |                                                                     |                                                                                            |                                                                                                                  |                            |
| Aufenthaltsstatus                   | Anerkennung                      | 1 (Ref.)                        | 1 (Ref.)                                      | 1 (Ref.)                                                            | 1 (Ref.)                                                                                   | 1 (Ref.)                                                                                                         | 1 (Ref.)                   |
|                                     | Asylsuchend oder<br>Ablehnung    | <b>1,786 [1,507-2,116]</b>      | <b>1,696 [1,416-2,030]</b>                    | <b>1,702 [1,421-2,040]</b>                                          | <b>1,519 [1,261-1,1828]</b>                                                                | <b>1,479 [1,227-1,782]</b>                                                                                       | <b>1,373 [1,128-1,671]</b> |
| Anhörung                            | Ausstehend                       |                                 | 1 (Ref.)                                      | 1 (Ref.)                                                            | 1 (Ref.)                                                                                   | 1 (Ref.)                                                                                                         | 1 (Ref.)                   |
|                                     | Stattgefunden                    |                                 | 0,867 [0,721-1,043]                           | 0,857 [0,712-1,031]                                                 | <b>0,813 [0,673-0,983]</b>                                                                 | <b>0,824 [0,681-0,997]</b>                                                                                       | 0,900 [0,735-1,103]        |
| Erwerbstätigkeit                    | Erwerbstätig                     |                                 |                                               | 1 (Ref.)                                                            | 1 (Ref.)                                                                                   | 1 (Ref.)                                                                                                         | 1 (Ref.)                   |
|                                     | Nicht erwerbstätig               |                                 |                                               | <b>2,032 [1,510-2,732]</b>                                          | <b>1,980 [1,463-2,680]</b>                                                                 | <b>1,882 [1,387-2,556]</b>                                                                                       | <b>1,610 [1,168-2,219]</b> |
| Wohnzufriedenheit                   |                                  |                                 |                                               |                                                                     | <b>0,847 [0,847-0,894]</b>                                                                 | <b>0,874 [0,851-0,898]</b>                                                                                       | <b>0,907 [0,881-0,934]</b> |
| Sprachkenntnisse<br>(Deutsch)       | Gut                              |                                 |                                               |                                                                     |                                                                                            | 1 (Ref.)                                                                                                         | 1 (Ref.)                   |
|                                     | Mittelmäßig                      |                                 |                                               |                                                                     |                                                                                            | 1,220 [0,950-1,567]                                                                                              | 1,102 [0,844-1,438]        |
|                                     | Schlecht                         |                                 |                                               |                                                                     |                                                                                            | <b>1,413 [1,100-1,813]</b>                                                                                       | 1,299 [0,994-1,699]        |
| Einsamkeit                          |                                  |                                 |                                               |                                                                     |                                                                                            |                                                                                                                  | <b>1,214 [1,179-1,249]</b> |
| Nagelkerkes R <sup>2</sup>          |                                  | 0,025                           | 0,025                                         | 0,036                                                               | 0,081                                                                                      | 0,085                                                                                                            | 0,164                      |
| Modell-df                           |                                  | 8                               | 9                                             | 10                                                                  | 11                                                                                         | 13                                                                                                               | 14                         |
| N                                   |                                  | 3515                            | 3457                                          | 3457                                                                | 3444                                                                                       | 3442                                                                                                             | 3288                       |

**Tabelle Z5:** Modell V: Zusammenhang zwischen Depression und postmigratorischen Stressoren, soziodemografischen Faktoren und psychosozialen Faktoren

| Prädiktorvariablen<br>OR [95%KI]    |                                  | Modell IV +<br>Selbstwertgefühl | Modell IV +<br>Selbstwertgefühl +<br>Resilientes<br>Copingverhalten | Modell IV +<br>Selbstwertgefühl +<br>Resilientes<br>Copingverhalten +<br>Lebenszufriedenheit | Modell V                    |
|-------------------------------------|----------------------------------|---------------------------------|---------------------------------------------------------------------|----------------------------------------------------------------------------------------------|-----------------------------|
| <b>Soziodemografische Faktoren</b>  |                                  |                                 |                                                                     |                                                                                              |                             |
| Alter                               |                                  | 1,007 [0,997-1,017]             | 1,009 [0,999-1,019]                                                 | 1,009 [0,999-1,020]                                                                          | 1,004 [0,992-1,015]         |
| Geschlecht                          | Männlich                         | 1 (Ref.)                        | 1 (Ref.)                                                            | 1 (Ref.)                                                                                     | 1 (Ref.)                    |
|                                     | Weiblich                         | 1,082 [0,866-1,352]             | 1,078 [0,855-1,358]                                                 | 1,164 [0,921-1,470]                                                                          | 0,853 [0,653-1,115]         |
| Partnerschaft                       | Ja                               | 1 (Ref.)                        | 1 (Ref.)                                                            | 1 (Ref.)                                                                                     | 1 (Ref.)                    |
|                                     | Nein                             | 0,908 [0,731-1,126]             | 0,900 [0,720-1,125]                                                 | 0,878 [0,701-1,101]                                                                          | 0,941 [0,731-1,212]         |
| Bildung                             | Kein Schulbesuch                 | 1 (Ref.)                        | 1 (Ref.)                                                            | 1 (Ref.)                                                                                     | 1 (Ref.)                    |
|                                     | Grundschule                      | 0,904 [0,631-1,295]             | 0,935 [0,632-1,383]                                                 | 0,991 [0,666-1,474]                                                                          | 1,140 [0,723-1,798]         |
|                                     | Mittelschule                     | 0,934 [0,677-1,290]             | 1,085 [0,764-1,542]                                                 | 1,100 [0,769-1,574]                                                                          | 1,269 [0,839-1,920]         |
|                                     | Weiterführende/<br>Andere Schule | 1,096 [0,802-1,498]             | 1,301 [0,925-1,830]                                                 | 1,298 [0,916-1,839]                                                                          | 1,411 [0,942-2,113]         |
| PTS-Wert der<br>Staatsangehörigkeit | PTS-Wert 1-3                     | 1 (Ref.)                        | 1 (Ref.)                                                            | 1 (Ref.)                                                                                     | 1 (Ref.)                    |
|                                     | PTS-Wert 4-5                     | <b>1,593 [1,189-2,136]</b>      | <b>1,583 [1,146-2,187]</b>                                          | <b>1,624 [1,169-2,254]</b>                                                                   | <b>1,759 [1,217-2,542]</b>  |
| <b>Postmigratorische Stressoren</b> |                                  |                                 |                                                                     |                                                                                              |                             |
| Aufenthaltsstatus                   | Anerkennung                      | 1 (Ref.)                        | 1 (Ref.)                                                            | 1 (Ref.)                                                                                     | 1 (Ref.)                    |
|                                     | Asylsuchend oder<br>Ablehnung    | <b>1,419 [1,160-1,737]</b>      | <b>1,450 [1,177-1,786]</b>                                          | <b>1,393 [1,127-1,722]</b>                                                                   | <b>1,344 [1,062-1,701]</b>  |
| Anhörung                            | Nein                             | 1 (Ref.)                        | 1 (Ref.)                                                            | 1 (Ref.)                                                                                     | 1 (Ref.)                    |
|                                     | Ja                               | 0,914 [0,742-1,126]             | 0,920 [0,740-1,143]                                                 | 0,893 [0,716-1,113]                                                                          | <b>0,710 [0,556-0,908]</b>  |
| Erwerbstätigkeit                    | Erwerbstätig                     | 1 (Ref.)                        | 1 (Ref.)                                                            | 1 (Ref.)                                                                                     | 1 (Ref.)                    |
|                                     | Nicht erwerbstätig               | <b>1,573 [1,137-2,176]</b>      | <b>1,627 [1,160-2,264]</b>                                          | <b>1,600 [1,145-2,236]</b>                                                                   | <b>1,483 [1,037-2,121]</b>  |
| Wohnzufriedenheit                   |                                  | <b>0,908 [0,882-0,936]</b>      | <b>0,910 [0,888-0,945]</b>                                          | <b>0,939 [0,908-0,970]</b>                                                                   | <b>0,943 [0,909-0,978]</b>  |
| Sprachkenntnisse<br>(Deutsch)       | Gut                              | 1 (Ref.)                        | 1 (Ref.)                                                            | 1 (Ref.)                                                                                     | 1 (Ref.)                    |
|                                     | Mittelmäßig                      | 1,118 [0,852-1,465]             | 1,110 [0,842-1,462]                                                 | 1,111 [0,841-1,468]                                                                          | 1,144 [0,841-1,557]         |
|                                     | Schlecht                         | 1,225 [0,932-1,611]             | 1,195 [0,904-1,578]                                                 | 1,159 [0,875-1,534]                                                                          | 1,239 [0,907-1,692]         |
| Einsamkeit                          |                                  | <b>1,206 [1,171-1,243]</b>      | <b>1,217 [1,180-1,256]</b>                                          | <b>1,194 [1,157-1,232]</b>                                                                   | <b>1,143 [1,103-1,184]</b>  |
| <b>Psychosoziale Faktoren</b>       |                                  |                                 |                                                                     |                                                                                              |                             |
| Selbstwertgefühl                    | Hoch                             | 1 (Ref.)                        | 1 (Ref.)                                                            | 1 (Ref.)                                                                                     | 1 (Ref.)                    |
|                                     | Mittelmäßig bis gering           | <b>1,422 [1,146-1,764]</b>      | <b>1,291 [1,026-1,626]</b>                                          | 1,261 [0,996-1,595]                                                                          | 1,175 [0,900-1,533]         |
| Resilientes<br>Copingverhalten      | Hoch                             |                                 | 1 (Ref.)                                                            | 1 (Ref.)                                                                                     | 1 (Ref.)                    |
|                                     | Mittelmäßig bis gering           |                                 | 1,135 [0,929-1,386]                                                 | 1,145 [0,935-1,404]                                                                          | <b>1,304 [1,038-1,639]</b>  |
| Allgemeine<br>Lebenszufriedenheit   | Hoch                             |                                 |                                                                     | 1 (Ref.)                                                                                     | 1 (Ref.)                    |
|                                     | Mittelmäßig                      |                                 |                                                                     | 1,155 [0,929-1,436]                                                                          | 0,910 [0,711-1,165]         |
|                                     | Gering                           |                                 |                                                                     | <b>3,293 [2,398-4,522]</b>                                                                   | <b>1,996 [1,388-2,868]</b>  |
| Ängstlichkeit                       | Keine Ängstlichkeit              |                                 |                                                                     |                                                                                              | 1 (Ref.)                    |
|                                     | Ängstlichkeit                    |                                 |                                                                     |                                                                                              | <b>9,055 [7,236-11,331]</b> |
| Nagelkerkes R <sup>2</sup>          |                                  | 0,161                           | 0,164                                                               | 0,189                                                                                        | 0,367                       |
| Modell-df                           |                                  | 15                              | 16                                                                  | 18                                                                                           | 19                          |
| N                                   |                                  | 3137                            | 2915                                                                | 2912                                                                                         | 2875                        |
